# Supplementary material
Source: publisher figshare collection journal article supplement (https://springernature.figshare.com/ndownloader/files/12841958)
Supplement: Supplementary file [file 12841958]

Participant number

The questions below ask about how you felt in the few hours and days after your baby was born. For each of the questions please circle the number that most applied to you. For each question 1 is the worst and 5 the best you might have felt.

In the first few hours after my baby was born

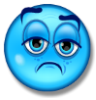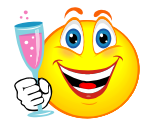

|                                                      |   |   |   |   |   |                                                                    |
|------------------------------------------------------|---|---|---|---|---|--------------------------------------------------------------------|
| I felt very unwell                                   | 1 | 2 | 3 | 4 | 5 | I felt very well                                                   |
| I felt very tired                                    | 1 | 2 | 3 | 4 | 5 | I didn't feel tired at all                                         |
| I was in a lot of pain                               | 1 | 2 | 3 | 4 | 5 | I felt no pain at all                                              |
| I was not supported by staff at all                  | 1 | 2 | 3 | 4 | 5 | I was very well supported by staff                                 |
| I felt very under confident about caring for my baby | 1 | 2 | 3 | 4 | 5 | I felt very confident about caring for my baby                     |
| I had no help or advice about caring for my baby     | 1 | 2 | 3 | 4 | 5 | I had all the help and advice I needed to help me care for my baby |

By the end of my stay in hospital

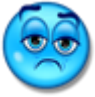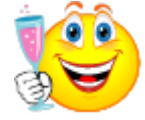

I felt very unwell

1

2

3

4

5

I felt very well

I felt very tired

1

2

3

4

5

I didn't feel tired at all

I was in a lot of pain

1

2

3

4

5

I felt no pain at all

I was not supported by staff at all

1

2

3

4

5

I was very well supported by staff

I felt very under confident about caring for my baby

1

2

3

4

5

I felt very confident about caring for my baby

I had no help or advice about caring for my baby

1

2

3

4

5

I had all the help and advice I needed to help me care for my baby

After the first night home with my baby

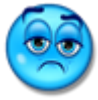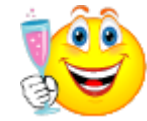

|                                                      |   |   |   |   |   |                                                                    |
|------------------------------------------------------|---|---|---|---|---|--------------------------------------------------------------------|
| I felt very unwell                                   | 1 | 2 | 3 | 4 | 5 | I felt very well                                                   |
| I felt very tired                                    | 1 | 2 | 3 | 4 | 5 | I didn't feel tired at all                                         |
| I was in a lot of pain                               | 1 | 2 | 3 | 4 | 5 | I felt no pain at all                                              |
| I was not supported by staff at all                  | 1 | 2 | 3 | 4 | 5 | I was very well supported by staff                                 |
| I felt very under confident about caring for my baby | 1 | 2 | 3 | 4 | 5 | I felt very confident about caring for my baby                     |
| I had no help or advice about caring for my baby     | 1 | 2 | 3 | 4 | 5 | I had all the help and advice I needed to help me care for my baby |

After the first visit by the midwife

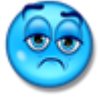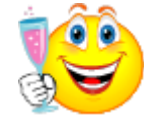

|                                                      |   |   |   |   |   |                                                                    |
|------------------------------------------------------|---|---|---|---|---|--------------------------------------------------------------------|
| I felt very unwell                                   | 1 | 2 | 3 | 4 | 5 | I felt very well                                                   |
| I felt very tired                                    | 1 | 2 | 3 | 4 | 5 | I didn't feel tired at all                                         |
| I was in a lot of pain                               | 1 | 2 | 3 | 4 | 5 | I felt no pain at all                                              |
| I was not supported by staff at all                  | 1 | 2 | 3 | 4 | 5 | I was very well supported by staff                                 |
| I felt very under confident about caring for my baby | 1 | 2 | 3 | 4 | 5 | I felt very confident about caring for my baby                     |
| I had no help or advice about caring for my baby     | 1 | 2 | 3 | 4 | 5 | I had all the help and advice I needed to help me care for my baby |

At the time the midwife stopped seeing me

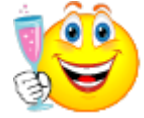

I felt very unwell

1

2

3

4

5

I felt very well

I felt very tired

1

2

3

4

5

I didn't feel tired at all

I was in a lot of pain

1

2

3

4

5

I felt no pain at all

I was not supported by staff at all

1

2

3

4

5

I was very well supported by staff

I felt very under confident about caring for my baby

1

2

3

4

5

I felt very confident about caring for my baby

I had no help or advice about caring for my baby

1

2

3

4

5

I had all the help and advice I needed to help me care for my baby
